# Supplementary figures and images for: Temporal modulation of collective cell behavior controls vascular network topology
Source: eLife journal article supplement (doi:10.7554/elife.13212), 2016-02-24

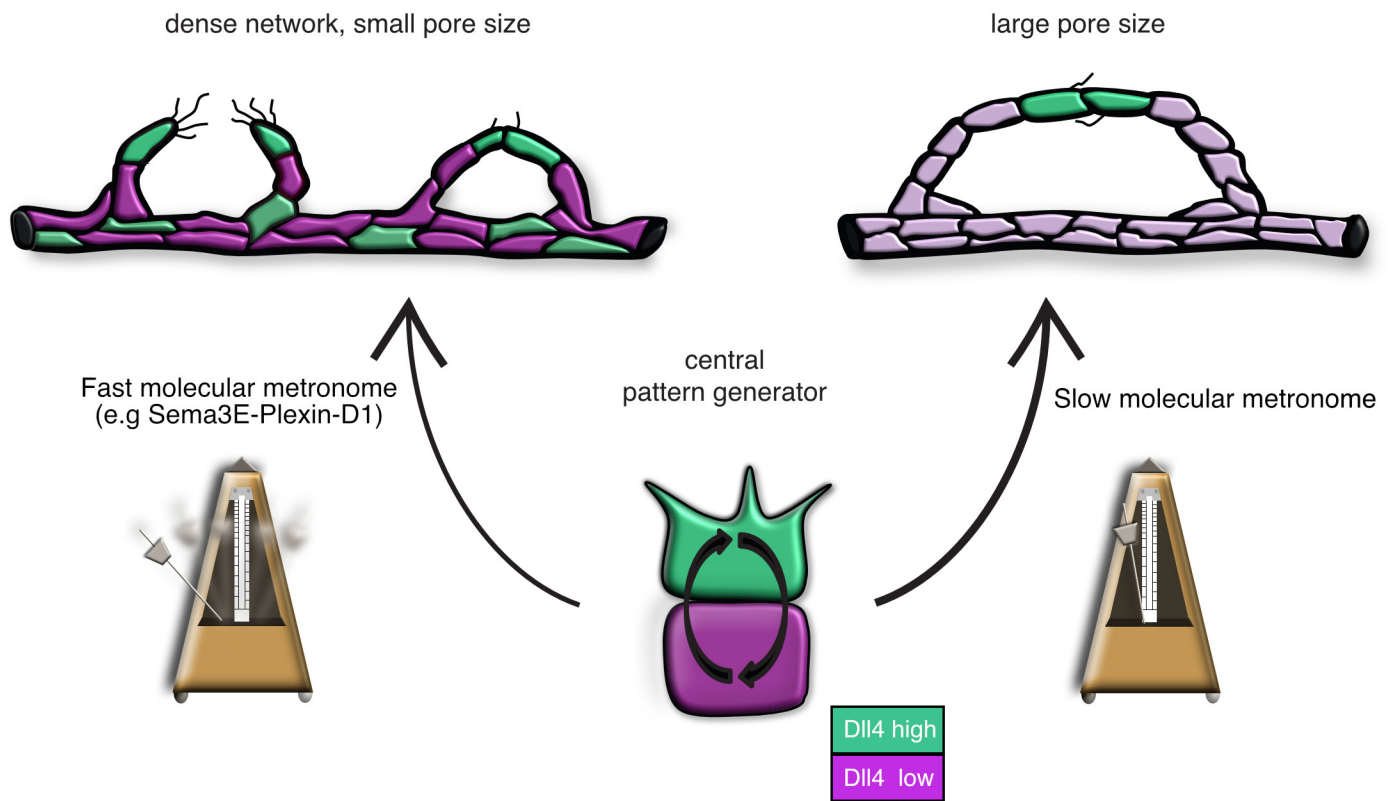

Figure 4 - figure supplement 3

Supplement: supp [file elife-13212-supp-v1.zip]

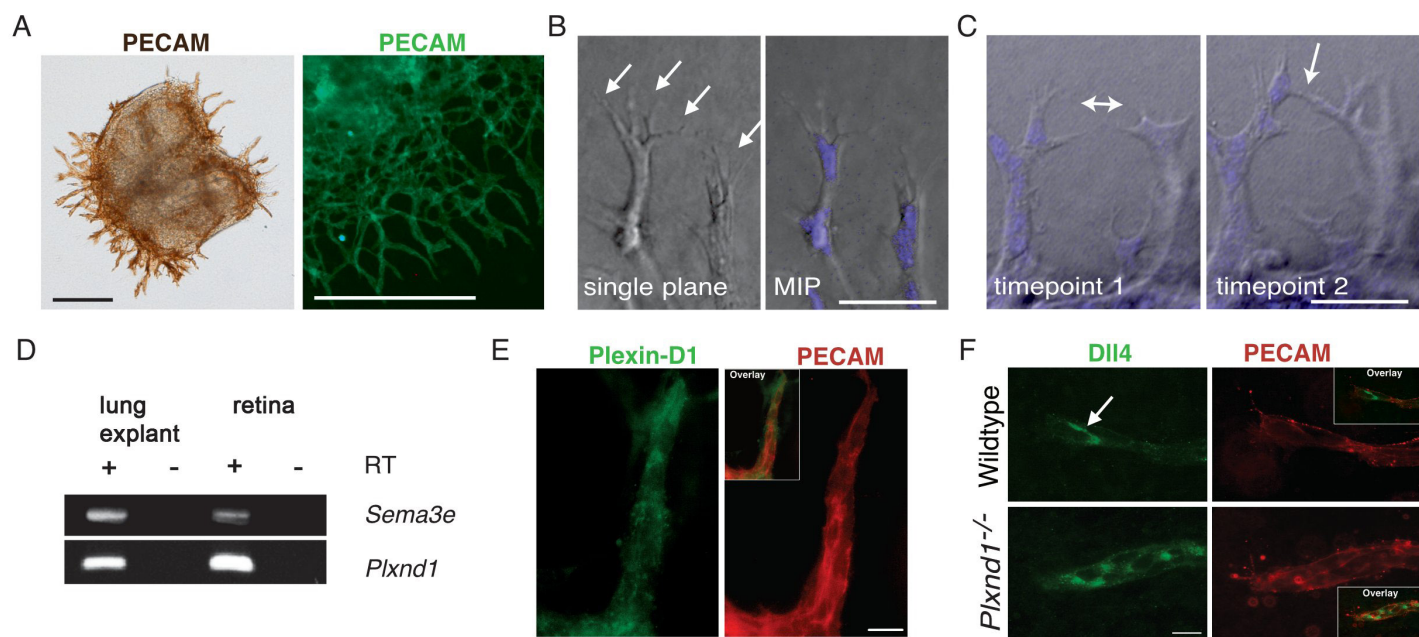

Figure 4 - figure supplement 1

Supplement: supp [file elife-13212-supp-v1.zip]

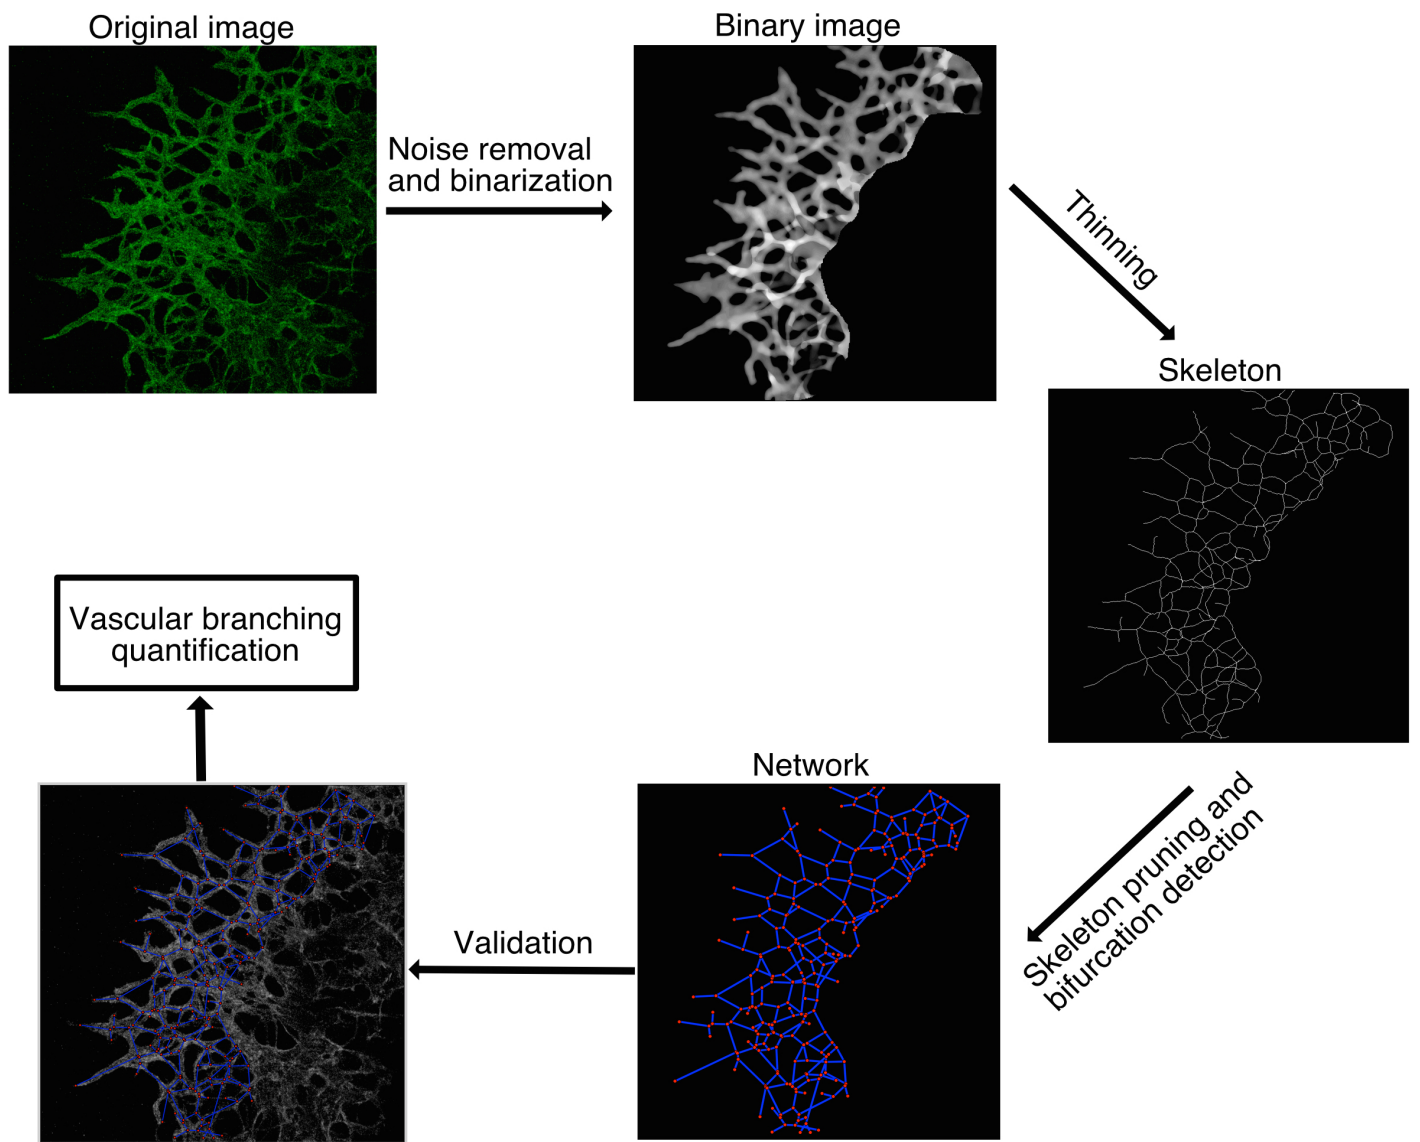

Figure 4 - figure supplement 2

Supplement: supp [file elife-13212-supp-v1.zip]
